# Supplementary material for: Ability of FDG PET and CT radiomics features to differentiate between primary and metastatic lung lesions
Source: Springer Nature journal article supplement (doi:10.1007/s00259-018-3987-2), 2018-04-06
Supplement: MOESM1 [file 15596604]

**Ability of FDG PET and CT radiomics features to differentiate between primary and metastatic lung lesions**

Margarita Kirienko1+, Luca Cozzi2,1+, Alexia Rossi1, 3, Emanuele Voulaz4, Lidija Antunovic5, Antonella Fogliata2, Arturo Chiti1,5, Martina Sollini1

1 Department of Biomedical Sciences, Humanitas University, Pieve Emanuele (Milan), Italy

2 Radiotherapy and Radiosurgery, Humanitas Clinical and Research Hospital, Rozzano (Milan), Italy

3 Radiology, Humanitas Clinical and Research Hospital, Rozzano (Milan), Italy

4 Thoracic Surgery, Humanitas Clinical and Research Hospital, Rozzano (Milan), Italy

5 Nuclear Medicine, Humanitas Clinical and Research Hospital, Rozzano (Milan), Italy

+Authors contributed equally

Corresponding author:

Martina Sollini, MD

Department of Biomedical Sciences, Humanitas University

Via Rita Levi Montalcini 4, 20090 Pieve Emanuele (Milan), Italy

Email: martina.sollini@cancercenter.humanitas.it

Supplementary material – European Journal of Nuclear Medicine and Molecular Imaging

Report on image processing and image biomarker extraction

| **General** | |
| --- | --- |
| Imaging | PET, CT |
| Acquisition and reconstruction | | **Acquisition parameters** | **Biograph –**  **Siemens** | | **Discovery 690 – General Electric** | | | --- | --- | --- | --- | --- | | PET | CT | PET | CT | | **18F-FDG activity (MBq)*** | 350–550 | – | 350–550 | – | | **Min/bed position** | 2.5 | – | 2 | – | | **Crystal** | LSO | – | LYSO | – | | **Reconstruction** | Iterative | – | Iterative, TOF Sharp IR | – | | **Matrix (pixels)** | 128×128 | 512×512 | 256×256 | 512×512 | | **Resolution (mm)** | 5.3×5.3 | 0.98×0.98 | 2.73×2.73 | 1.37×1.37 | | **Slice thickness (mm)** | 2.0 | 4.0 | 3.27 | 3.27 | | **Slices** | – | 6 | – | 64 | | **Voltage (kV)** | – | 130 | – | 140 | | **Tube current (mA)** | – | 95 | – | 140 | | **Reconstruction** |  | – | Iterative, TOF Sharp IR | – | | *Administered activity was calculated according to the European Association of Nuclear Medicine (EANM) guidelines 1.0 and, from February 2015, 2.0 [21] | | | | | |
| Approach | The images were analysed as a volume (3D). |
| Process structure | Image acquisition -> reconstruction -> anonymisation -> segmentation -> export -> texture analysis -> feature calculation report |
| Software | LIFEx 3.0  (IMIV, CEA, Inserm, CNRS, Univ. Paris-Sud, Université Paris Saclay, CEA-SHFJ, 91400, Orsay, France) |
| Data availability | All the original patient DICOM files are stored in the institutional PACS. Anonymised DICOM files that include the VOIs in RTSS format are stored on the department hard disk. The calculations of the features are stored in the repository (link). |
| **Data conversion** | |
| Procedure | None |
| **Image post-acquisition processing** | |
| Procedure | None |
| **Segmentation** | |
| ROI | The volume of interest (VOI) included the primary tumour lesion. Textural features were calculated on both CT and PET images within the same VOI. |
| Procedure | The ROIs were (semi-)automatically defined on PET images with a threshold of 40% of the maximum standardised uptake value (SUVmax) using a commercial software (PET VCAR, GE Healthcare, Waukesha, WI, USA). |
| **Interpolation** |  |
| Voxel dimensions | Not applicable |
| Image interpolation method | Not applicable |
| Image intensity rounding | Not applicable |
| ROI interpolation method | Not applicable |
| ROI partial volume | Not applicable |
| **Re-segmentation** |  |
| ROI mask criteria | None |
| **Discretisation** |  |
| Discretisation method | PET: 64 bins from 0 to 25  CT: 400 bins from -1000 to 3000 |
| **Feature calculation** |  |
| Feature set | **Basic features CT**  Minimum  Maximum  Mean  Standard deviation  Volume  **Basic features PET**  SUVminimum  SUVmaximum  SUVmean  SUVstandard deviation  SUVpeak sphere  Volume  TLG  **Geometry-based and histogram-based**  Sphericity  Compacity  Skewness  Kurtosis  Entropy  Energy  **Grey level co-occurrence**  Homogeneity 1  EnergyGLCM  ContrastGLCM  Correlation  EntropyGLCM  Dissimilarity  **Neighbourhood grey level difference matrix**  Contrast  Coarseness  **Grey level run length matrix**  Short-run emphasis  Long-run emphasis  Low grey level run emphasis  High grey level run emphasis  Short-run low grey level emphasis  Short-run high grey level emphasis  Long-run low grey level emphasis  Long-run high grey level emphasis  Grey level non-uniformity for run  Run length non-uniformity  Run percentage  **Grey level zone length matrix**  Short-zone emphasis  Long-zone emphasis  Low grey level zone emphasis  High grey level zone emphasis  Short-zone low grey level emphasis  Short-zone high grey level emphasis  Long-zone low grey level emphasis  Long-zone high grey level emphasis  Grey level non-uniformity for zone  Zone length non-uniformity zone percentage |
| Feature parameters | The parameters were calculated according to the formulas described in the software manual (LIFEx 3.0 )  (IMIV, CEA, Inserm, CNRS, Univ. Paris-Sud, Université Paris Saclay, CEA-SHFJ, 91400, Orsay, France) |
| Standardisation | Not performed |
